# Supplementary material for: The RNase MCPIP3 promotes skin inflammation by orchestrating myeloid cytokine response
Source: PubMed Central journal article supplement (PMC8253787; doi:10.1038/s41467-021-24352-w), 2021-07-02
Supplement: 41467_2021_24352_MOESM1_ESM.pdf [file 41467_2021_24352_MOESM1_ESM.pdf]

## List of Supplementary Information

Supplementary Fig. 1 Generation of MCPIP3-deficient mice

Supplementary Fig. 2 MCPIP3 is dispensable for immune cell development

Supplementary Fig. 3 MCPIP3 does not regulate classic M1/M2 functions

Supplementary Fig. 4 MCPIP3 is dispensable for IFN- $\alpha$  and TNF production by DCs

Supplementary Fig. 5 The role of MCPIP3 in various immune subsets involved in psoriasis

Supplementary Fig. 6 Screening of transcriptional regulators in MCPIP3-deficient macrophages

Supplementary Fig. 7 Screening of transcriptional regulators in MCPIP3-deficient pDCs

Supplementary Fig. 8 Flow cytometry gating strategies

Supplementary Table 1: Primer sequences

Source Data: Raw data for all figures

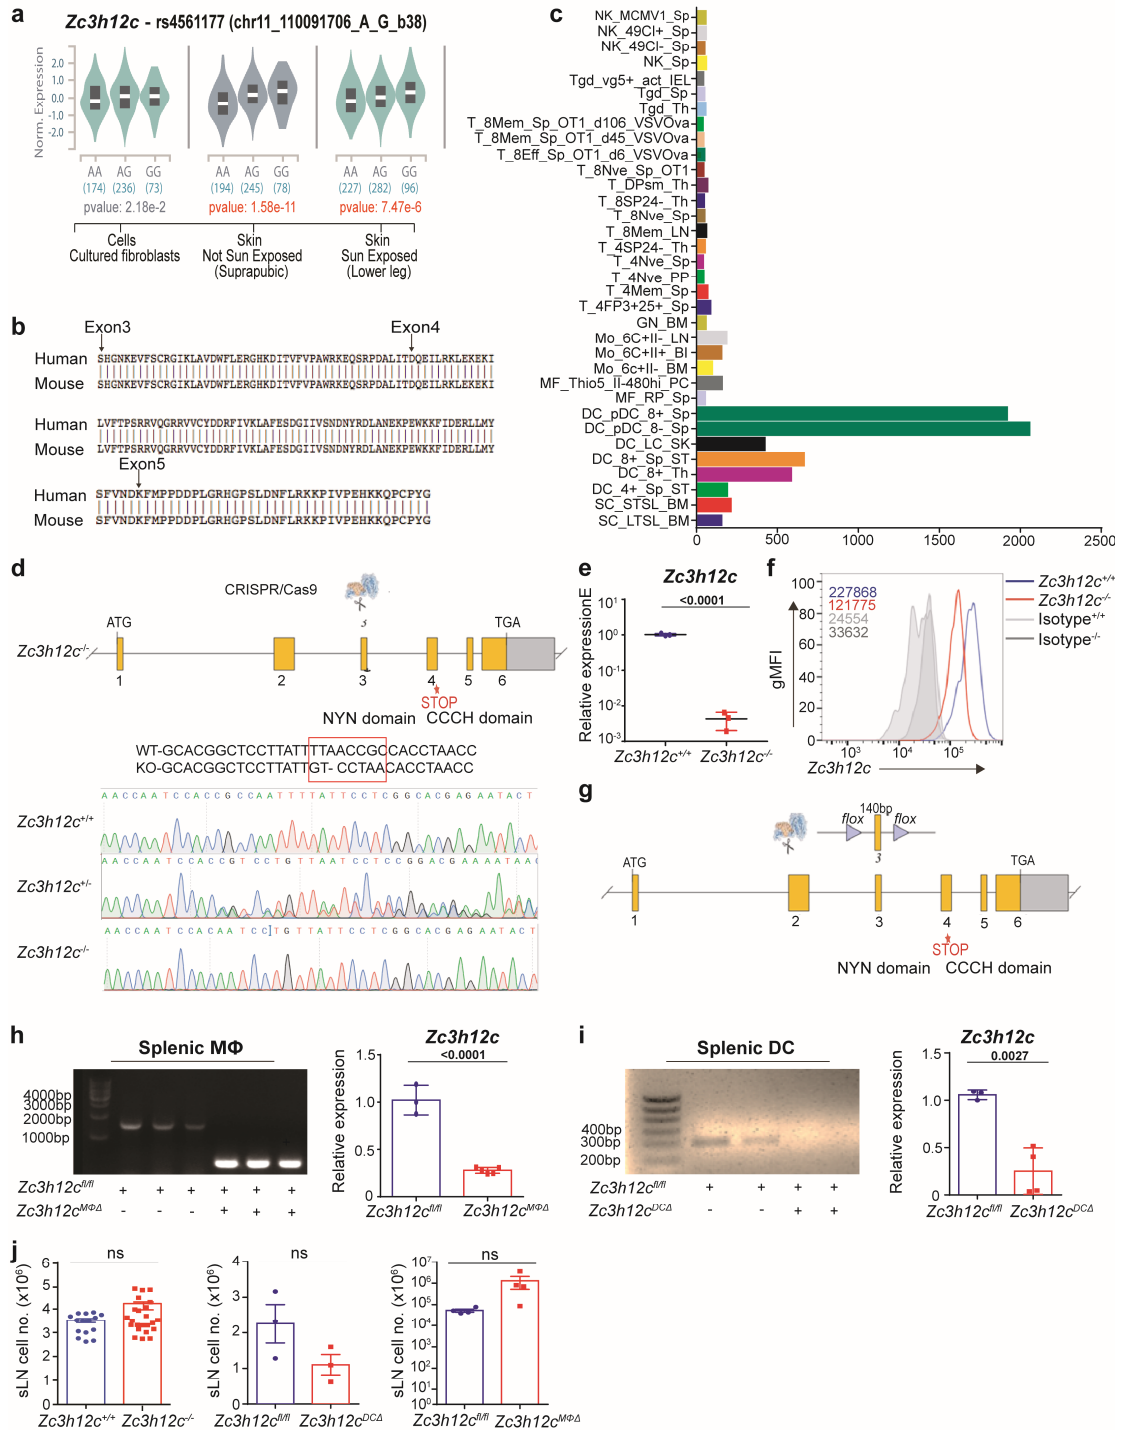

### Supplementary Fig. 1 Generation of MCPIP3-deficient mice

- eQTL analysis of SNP (rs4561177) using GTEx at [www.gtexportal.org](http://www.gtexportal.org).
- Amino acid sequence comparison of MCPIP3 Exon 3-5 between humans and mice.
- Expression of *Zc3h12c* mRNA (in arbitrary units) in the indicated populations reanalyzed from the IMMGEN gene microarray.
- Schematics for the generation of *Zc3h12c*<sup>-/-</sup> mice.
- Zc3h12c* mRNA expression from sorted bone marrow pDCs from *Zc3h12c*<sup>+/+</sup>/*Zc3h12c*<sup>-/-</sup> mice, measured by qPCR (n=3 mice per group).
- MCPIP3 protein expression from bone marrow pDCs from *Zc3h12c*<sup>+/+</sup>/*Zc3h12c*<sup>-/-</sup> mice,

measured by anti-MCPIP3 polyclonal antibodies (n=3 pooled mice per group).

- g** Schematics for the generation of *Zc3h12c<sup>fl/fl</sup>* mice.
- h** Verification of *Zc3h12c<sup>MΦΔ</sup>* mice. Splenic CD11b<sup>+</sup> F4/80<sup>+</sup> macrophages from *Zc3h12c<sup>fl/fl</sup>*/*Zc3h12c<sup>MΦΔ</sup>* were FACS-sorted, and checked for deletion with PCR (left) and qPCR(right) (n=3 mice per group).
- i** Verification of *Zc3h12c<sup>DCΔ</sup>* mice. Splenic CD11c<sup>+</sup> cells from *Zc3h12c<sup>fl/fl</sup>*/*Zc3h12c<sup>DCΔ</sup>* were FACS-sorted, and checked for deletion with PCR (left) and qPCR(right) (n=3 mice per group).
- j** Skin-draining (popliteal, axillary, and brachial) lymph node cell numbers of *Zc3h12c<sup>+/+</sup>*/*Zc3h12c<sup>-/-</sup>*, *Zc3h12c<sup>fl/fl</sup>*/*Zc3h12c<sup>DCΔ</sup>*, *Zc3h12c<sup>fl/fl</sup>*/*Zc3h12c<sup>MΦΔ</sup>* mice (~12 weeks) (n=18 mice for *Zc3h12c<sup>+/+</sup>*; n=23 mice for *Zc3h12c<sup>-/-</sup>*; n=3 for *Zc3h12c<sup>fl/fl</sup>*/*Zc3h12c<sup>DCΔ</sup>*; n=5 for *Zc3h12c<sup>fl/fl</sup>*/*Zc3h12c<sup>MΦΔ</sup>*).

Source data are provided as a Source Data file (two-tailed Student's t-test). ns= not significant. Data are representative of at least two independent experiments (mean±S.D.).

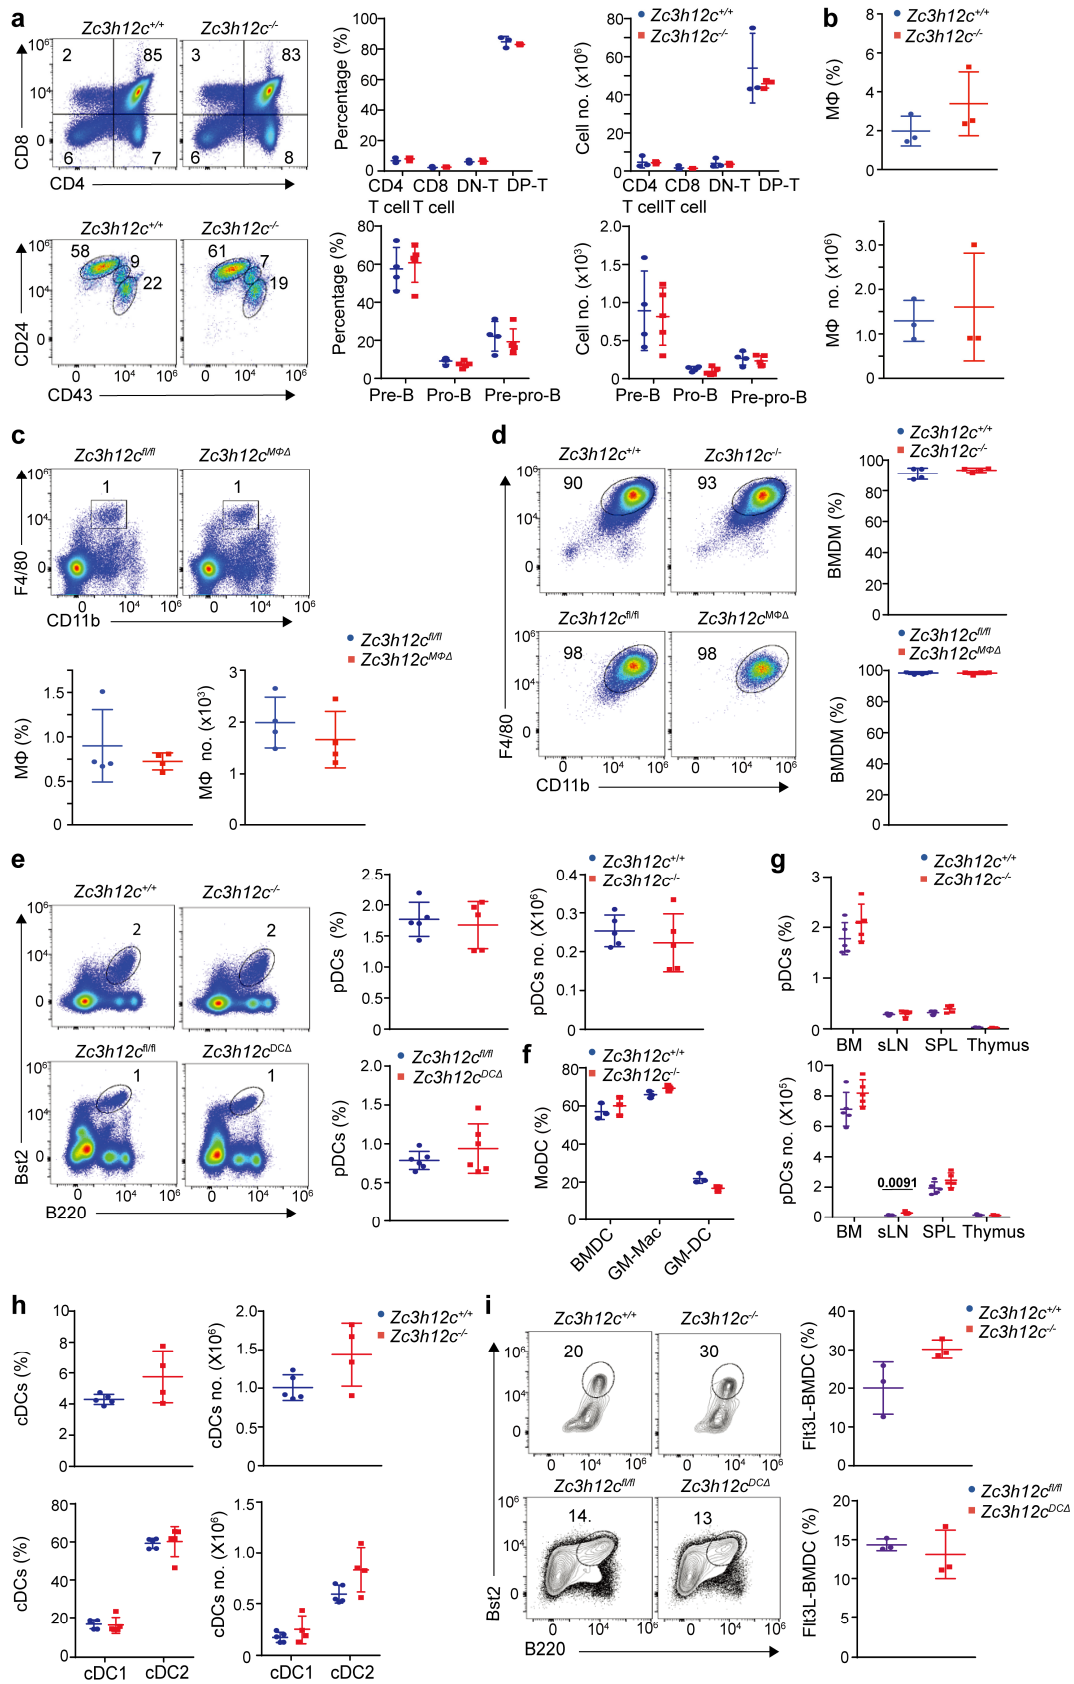

### Supplementary Fig. 2 MCPIP3 is dispensable for immune cell development

- a** Distribution of T and B cell subsets in *Zc3h12*<sup>+/+</sup>/*Zc3h12*<sup>-/-</sup> mice (n=4 mice per group).
- b** Distribution of splenic macrophages in *Zc3h12*<sup>+/+</sup>/*Zc3h12*<sup>-/-</sup> mice (n=3 mice per group).

- c** Distribution of splenic macrophages in *Zc3h12c<sup>fl/fl</sup>/Zc3h12c<sup>MΦΔ</sup>* mice (n=4 mice per group).
- d** Percentages of macrophages from BMDMs in *Zc3h12c<sup>+/+</sup>/Zc3h12c<sup>-/-</sup>* and *Zc3h12c<sup>fl/fl</sup>/Zc3h12c<sup>MΦΔ</sup>* mice (n=3 mice per group).
- e** Distribution of bone marrow pDCs in *Zc3h12c<sup>+/+</sup>/Zc3h12c<sup>-/-</sup>* and *Zc3h12c<sup>fl/fl</sup>/Zc3h12c<sup>DCΔ</sup>* mice (n=5 mice per group).
- f** Percentages of *Zc3h12c<sup>+/+</sup>/Zc3h12c<sup>-/-</sup>* BMDC and subsets (n=3 mice per group).
- g** Distribution of pDCs in different immune organs of *Zc3h12c<sup>+/+</sup>/Zc3h12c<sup>-/-</sup>* mice (n=5 mice per group).
- h** Distribution of splenic cDCs in *Zc3h12c<sup>+/+</sup>/Zc3h12c<sup>-/-</sup>* mice (n=4 mice per group).
- i** Percentages of FL3TL-pDCs in *Zc3h12c<sup>+/+</sup>/Zc3h12c<sup>-/-</sup>* and *Zc3h12c<sup>fl/fl</sup>/Zc3h12c<sup>DCΔ</sup>* mice (n=3 mice per group).

Source data are provided as a Source Data file (two-tailed Student's t-test). Data are representative of at least two independent experiments (mean±S.D.).

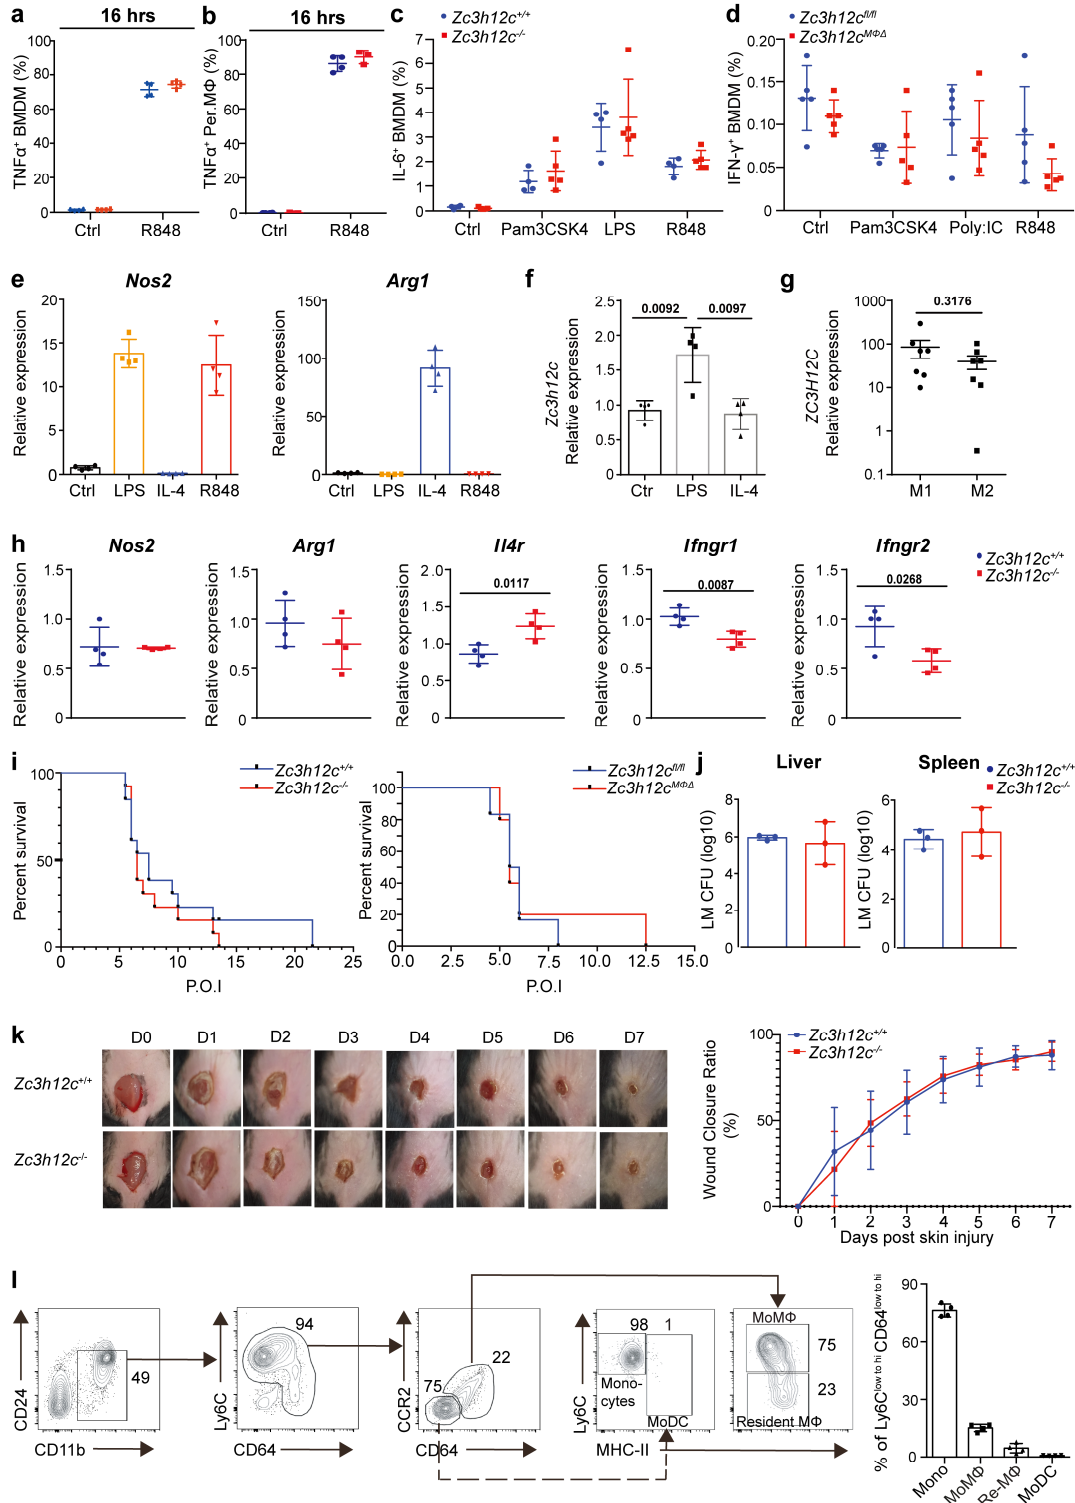

### Supplementary Fig. 3 MCPIP3 does not regulate classic M1/M2 functions

- TNF production by activated *Zc3h12c*<sup>+/+</sup>/*Zc3h12c*<sup>-/-</sup> BMDMs was measured by intracellular staining after 16 hours (n=4 mice per group).
- TNF production by activated *Zc3h12c*<sup>+/+</sup>/*Zc3h12c*<sup>-/-</sup> Per.M $\Phi$  was measured by intracellular staining after 16 hours (n=4 mice per group).
- IL-6 production (intracellular staining) by *Zc3h12c*<sup>+/+</sup>/*Zc3h12c*<sup>-/-</sup> BMDMs stimulated in vitro with indicated ligands (n=5 mice per group).

- d** IFN- $\gamma$  production (intracellular staining) by *Zc3h12c*<sup>+/+</sup>/*Zc3h12c*<sup>-/-</sup> BMDMs stimulated in vitro with indicated ligands (n=5 mice per group).
- e** *Nos2* and *Arg1* expression in M1/M2/R848 conditioned *Zc3h12c*<sup>+/+</sup> BMDMs (n=4 mice per group).
- f** *Zc3h12c* expression in M1/M2 conditioned WT BMDMs (n=4 mice per group).
- g** *ZC3H12C* expression in M1/M2 conditioned healthy human PMBC monocyte-derived macrophages (n=7 individuals per group).
- h** Signature M1/M2 genes expression in R848-conditioned *Zc3h12c*<sup>+/+</sup>/*Zc3h12c*<sup>-/-</sup> BMDMs (n=4 mice per group).
- i** Survival curve of LPS-induced sepsis in *Zc3h12c*<sup>+/+</sup>/*Zc3h12c*<sup>-/-</sup> and *Zc3h12c*<sup>fl/fl</sup>/*Zc3h12c*<sup>M $\Phi$  $\Delta$</sup>  mice (n=10 mice per group).
- j** Bacterial load (CFU) of liver and spleen from *Zc3h12c*<sup>+/+</sup>/*Zc3h12c*<sup>-/-</sup> mice infected with *Listeria monocytogenes* (n=3 mice per group).
- k** Wound closure rate of *Zc3h12c*<sup>+/+</sup>/*Zc3h12c*<sup>-/-</sup> mice (n=5 mice per group).
- l** Distribution of myeloid cells from IMQ-treated back-skin of WT mice at day 3. Monocytes (CD11b<sup>+</sup> CD24<sup>low</sup>, Ly6c<sup>low to hi</sup> CD64<sup>low to hi</sup>, F4/80<sup>-</sup> CCR2<sup>-</sup>, Ly6C<sup>+</sup> MHCII<sup>-</sup>), MoDC (CD11b<sup>+</sup> CD24<sup>low</sup>, Ly6c<sup>low to hi</sup> CD64<sup>low to hi</sup>, F4/80<sup>-</sup> CCR2<sup>-</sup>, Ly6c<sup>+</sup> MHCII<sup>+</sup>), MoM $\Phi$  (CD11b<sup>+</sup> CD24<sup>low</sup>, Ly6c<sup>low to hi</sup> CD64<sup>low to hi</sup>, F4/80<sup>+</sup> CCR2<sup>+</sup>, Ly6c<sup>hi</sup> MHCII<sup>+</sup>), resident M $\Phi$  (CD11b<sup>+</sup> CD24<sup>low</sup>, Ly6c<sup>low to hi</sup> CD64<sup>low to hi</sup>, F4/80<sup>+</sup> CCR2<sup>+</sup>, Ly6c<sup>low</sup> MHCII<sup>+</sup>) were calculated as percentages of live CD45<sup>+</sup> CD11b<sup>+</sup> cells (n=4 mice per group).

Data are representative of at least two independent experiments (mean $\pm$ S.D.) Source data are provided as a Source Data file (two-tailed Student's t-test for murine samples; two-tailed Mann Whitney test for human samples; Log-rank (Mantel-Cox) test for survival curves).

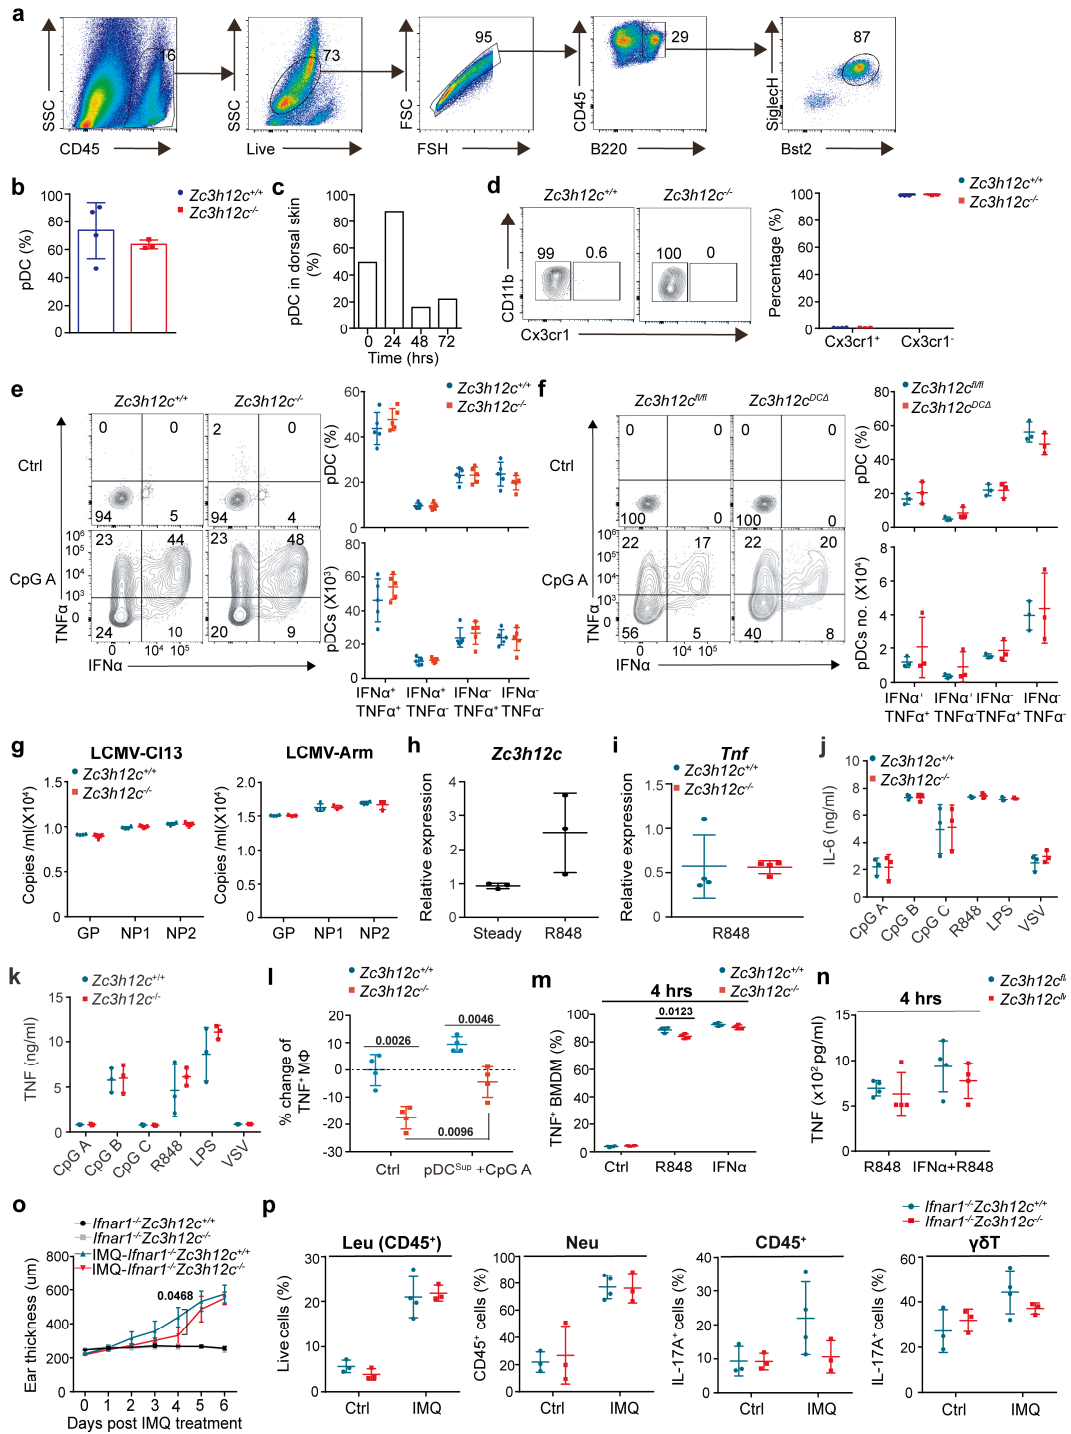

### Supplementary Fig. 4 MCPIP3 is dispensable for IFN- $\alpha$ and TNF production by DCs

- FACS gating strategy to identify pDCs in IMQ-treated skin on day 1.
- pDC percentages from IMQ-treated back-skin of *Zc3h12c<sup>+/+</sup>*/*Zc3h12c<sup>-/-</sup>* mice on day 1 (n=5 mice per group).
- pDC percentages from WT IMQ-treated back-skin on indicated days (n= 1 mice per group)
- CX3CR1 expression of pDCs in IMQ-treated skin of *Zc3h12c<sup>+/+</sup>*/*Zc3h12c<sup>-/-</sup>* mice at day 1 (n=3 mice per group).
- IFN- $\alpha$  and TNF production (measured by intracellular staining) by BM *Zc3h12c<sup>+/+</sup>*/*Zc3h12c<sup>-/-</sup>* pDCs stimulated in vitro with CpG A and R848 (n=5 mice per group).



- f** IFN- $\alpha$  and TNF production (measured by intracellular staining) by BM *Zc3h12c<sup>fl/fl</sup>/Zc3h12c<sup>DC $\Delta$</sup>*  pDCs stimulated in vitro with CpG A (n=5 mice per group).
- g** Viral titer of *Zc3h12c<sup>+/+</sup>/Zc3h12c<sup>-/-</sup>* mice infected with LCMV-Armstrong or clone 13 was measured by qPCR (n=3 mice per group).
- h** *Zc3h12c* expression in R848-activated sorted splenic *Zc3h12c<sup>fl/fl</sup>/Zc3h12c<sup>DC $\Delta$</sup>*  cDC2s was measured by qPCR (n=4 mice per group)
- i** *Tnf* expression in sorted splenic *Zc3h12c<sup>fl/fl</sup>/Zc3h12c<sup>DC $\Delta$</sup>*  cDC2s was measured by qPCR after 24 hours of activation with R848 (n=4 mice per group)
- j** IL-6 secretion by *Zc3h12c<sup>+/+</sup>/Zc3h12c<sup>-/-</sup>* BMDC (moDC) were measured by ELISA (n=4 mice per group).
- k** TNF secretion by *Zc3h12c<sup>+/+</sup>/Zc3h12c<sup>-/-</sup>* BMDC (moDC) were measured by ELISA (n=4 mice per group).
- l** Sorted WT FL3TL-pDCs were treated with CpG A for 24 hours, and their supernatants (pDC<sup>sup</sup>) were added to *Zc3h12c<sup>+/+</sup>/Zc3h12c<sup>-/-</sup>* BMDMs along with R848. TNF production in macrophages was measured by intracellular staining. Percentage changes was normalized against *Zc3h12c<sup>+/+</sup>* samples without pDC<sup>sup</sup> (n=4 mice per group).
- m** *Zc3h12c<sup>+/+</sup>/Zc3h12c<sup>-/-</sup>* BMDMs were cultured with recombinant (1mg/ml) IFN- $\alpha$  for 48 hours, then treated with R848. TNF production is measured by intracellular staining after 4 hours (n=3 mice per group).
- n** *Zc3h12c<sup>+/+</sup>/Zc3h12c<sup>-/-</sup>* BMDMs were cultured with recombinant (1mg/ml) IFN- $\alpha$  for 48 hours, then treated with R848. TNF production is measured by ELISA after 4 hours (n=4 mice per group).
- o** Ear skin thickness of the IMQ-treated *Ifnar1<sup>-/-</sup>; Zc3h12c<sup>+/+</sup>* or *Ifnar1<sup>-/-</sup>; Zc3h12c<sup>-/-</sup>* mice were measured daily (n=4 mice for *Zc3h12c<sup>+/+</sup>*; n=3 mice for *Zc3h12c<sup>-/-</sup>*).
- p** Infiltrated CD45<sup>+</sup> or Ly6G<sup>+</sup> immune cell percentages, IL-17A production by CD45<sup>+</sup> or  $\gamma\delta$  T cells at the IMQ-treated *Ifnar1<sup>-/-</sup>; Zc3h12c<sup>+/+</sup>* or *Ifnar1<sup>-/-</sup>; Zc3h12c<sup>-/-</sup>* mice were measured by FACS (n=4 mice for *Zc3h12c<sup>+/+</sup>*; n=3 mice for *Zc3h12c<sup>-/-</sup>*).

Source data are provided as a Source Data file (two-tailed Student's t-test). Data are representative of at least two independent experiments (mean $\pm$ S.D.)

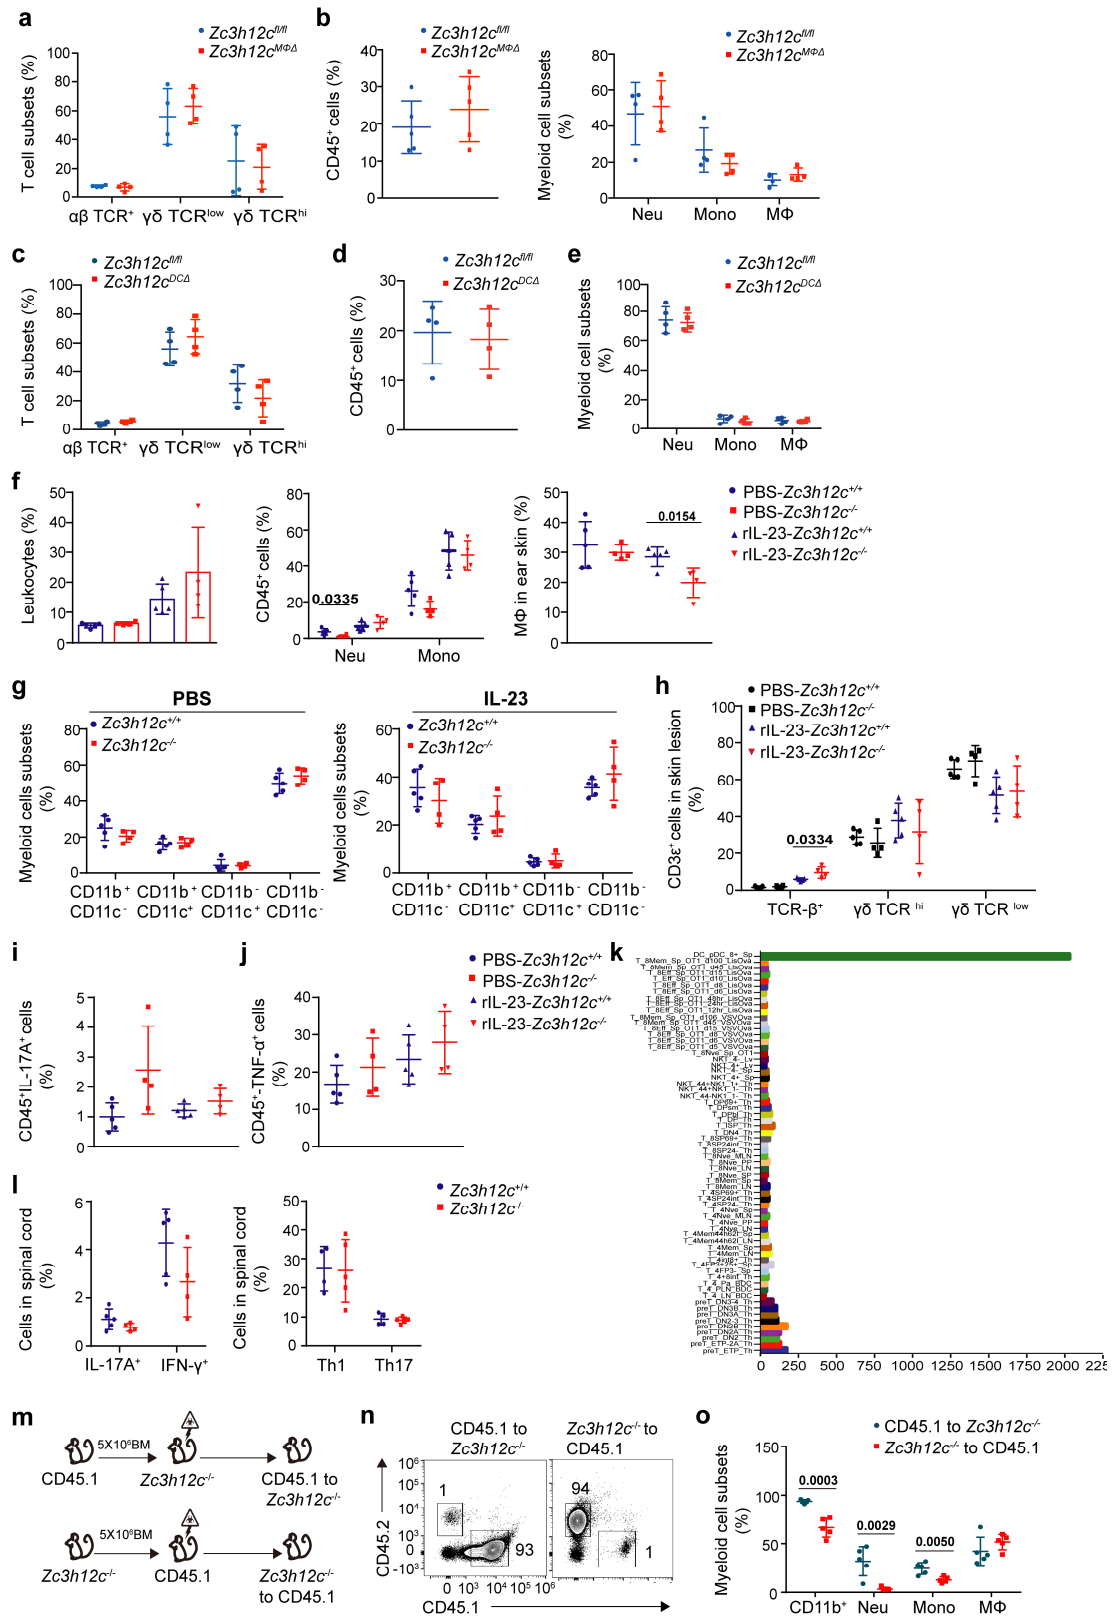

**Supplementary Fig. 5 The role of MCPIP3 in various immune subsets involved in psoriasis**

- a** Infiltrated T cell percentages at IMQ-treated skin of *Zc3h12c<sup>fl/fl</sup>/Zc3h12c<sup>MΦΔ</sup>* mice at D4 (n=5 mice per group).
- b** Infiltrated immune cell percentages at IMQ-treated skin of *Zc3h12c<sup>fl/fl</sup>/Zc3h12c<sup>MΦΔ</sup>* mice at

- D4 (n=5 mice per group).
- c** Infiltrated T cell percentages and their IL-17A production at IMQ-treated skin of *Zc3h12c<sup>fl/fl</sup>/Zc3h12c<sup>DCA</sup>* mice at D4 (n=5 mice per group).
  - d** Infiltrated leukocyte percentages at IMQ-treated skin of *Zc3h12c<sup>fl/fl</sup>/Zc3h12c<sup>DCA</sup>* mice at D4 (n=5 mice per group).
  - e** Infiltrated myeloid cell percentages at IMQ-treated skin of *Zc3h12c<sup>fl/fl</sup>/Zc3h12c<sup>DCA</sup>* mice at D4 (n=5 mice per group).
  - f** Infiltrated immune cell percentages at rIL-23-treated skin. Immune cells from IMQ-treated *Zc3h12c<sup>+/+</sup>/Zc3h12c<sup>-/-</sup>* ear-skin were isolated at day 9, and analyzed by flow cytometry (n=5 mice for *Zc3h12c<sup>+/+</sup>*; n=4 mice for *Zc3h12c<sup>-/-</sup>*).
  - g** Infiltrated myeloid cell percentages at rIL-23-treated skin (n=5 mice for *Zc3h12c<sup>+/+</sup>*; n=4 mice for *Zc3h12c<sup>-/-</sup>*).
  - h** Infiltrated T cell percentages at rIL-23-treated skin (n=5 mice for *Zc3h12c<sup>+/+</sup>*; n=4 mice for *Zc3h12c<sup>-/-</sup>*).
  - i** IL-17A production by T cells at rIL-23-treated skin (n=5 mice for *Zc3h12c<sup>+/+</sup>*; n=4 mice for *Zc3h12c<sup>-/-</sup>*).
  - j** TNF production by leukocytes (CD45<sup>+</sup>) at rIL-23-treated skin (n=5 mice for *Zc3h12c<sup>+/+</sup>*; n=4 mice for *Zc3h12c<sup>-/-</sup>*).
  - k** Expression of *Zc3h12c* mRNA (in arbitrary units) in the indicated T cell populations reanalyzed from the IMMGEN gene microarray.
  - l** IFN $\gamma$  and IL-17A production by CD4<sup>+</sup> T cells from spinal cord fluids of EAE-induced *Zc3h12c<sup>+/+</sup>/Zc3h12c<sup>-/-</sup>* mice (n=5 mice for *Zc3h12c<sup>+/+</sup>*; n=4 mice for *Zc3h12c<sup>-/-</sup>*).
  - m** Schematics for the generation of the straight (*Zc3h12c<sup>-/-</sup>* BM to CD45.1 host) and reverse (CD45.1 BM to *Zc3h12c<sup>-/-</sup>* host) chimeras.
  - n** Verification of the straight/reverse chimeras. FACS plots of host and recipient CD45<sup>+</sup> cells from spleen ~2 months after irradiation were shown.
  - o** Infiltrated myeloid cell percentages at IMQ-treated skin of chimeras at D4 (n=5 mice per group).

Source data are provided as a Source Data file (two-tailed Student's t-test). Data are representative of at least two independent experiments (mean $\pm$ S.D.)

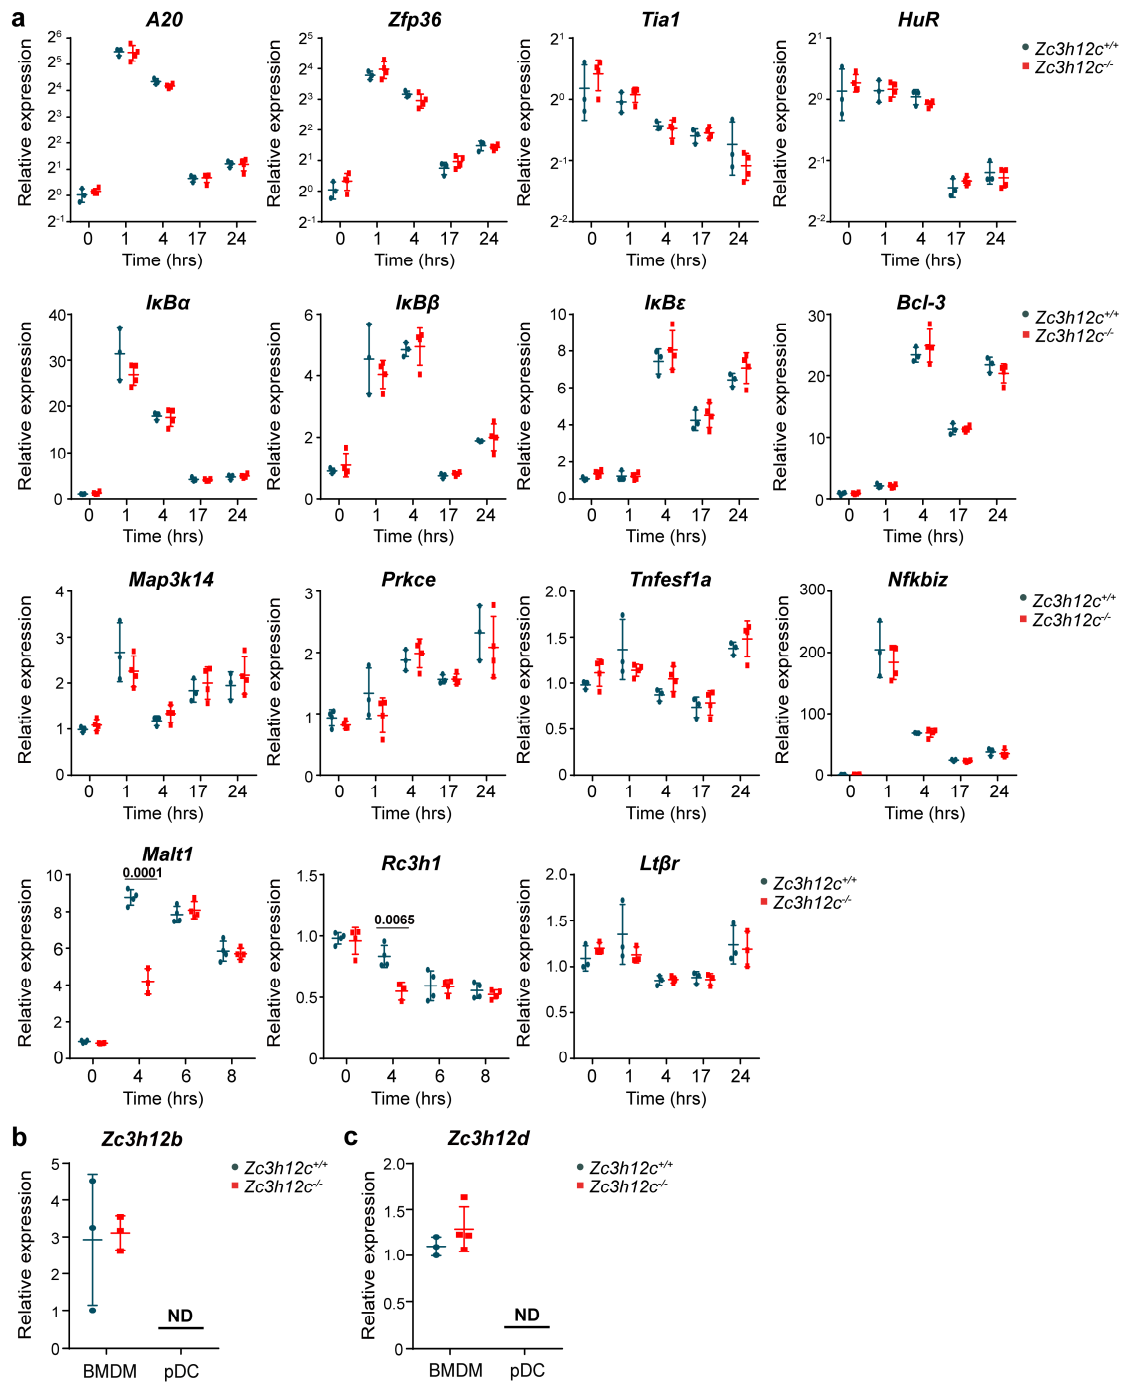

**Supplementary Fig. 6 Screening of transcriptional regulators in MCPiP3-deficient macrophages**

**a** mRNA expressions of the indicated genes were measured by qPCR in sorted *Zc3h12c*<sup>+/+</sup>/*Zc3h12c*<sup>-/-</sup> BMDMs at indicated timepoints after R848 activation (n=3 mice for *Zc3h12c*<sup>+/+</sup>; n=4 mice for *Zc3h12c*<sup>-/-</sup>).

**b-c** *Zc3h12b* (**b**) or *Zc3h12d* (**c**) expression in sorted *Zc3h12c*<sup>+/+</sup>/*Zc3h12c*<sup>-/-</sup> BMDMs and FL3TL-pDCs was measured by qPCR (n=3 mice for *Zc3h12c*<sup>+/+</sup>; n=4 mice for *Zc3h12c*<sup>-/-</sup>).

Source data are provided as a Source Data file (two-tailed Student's t-test). ND= not detected.

Data are representative of at least two independent experiments (mean $\pm$ S.D.)

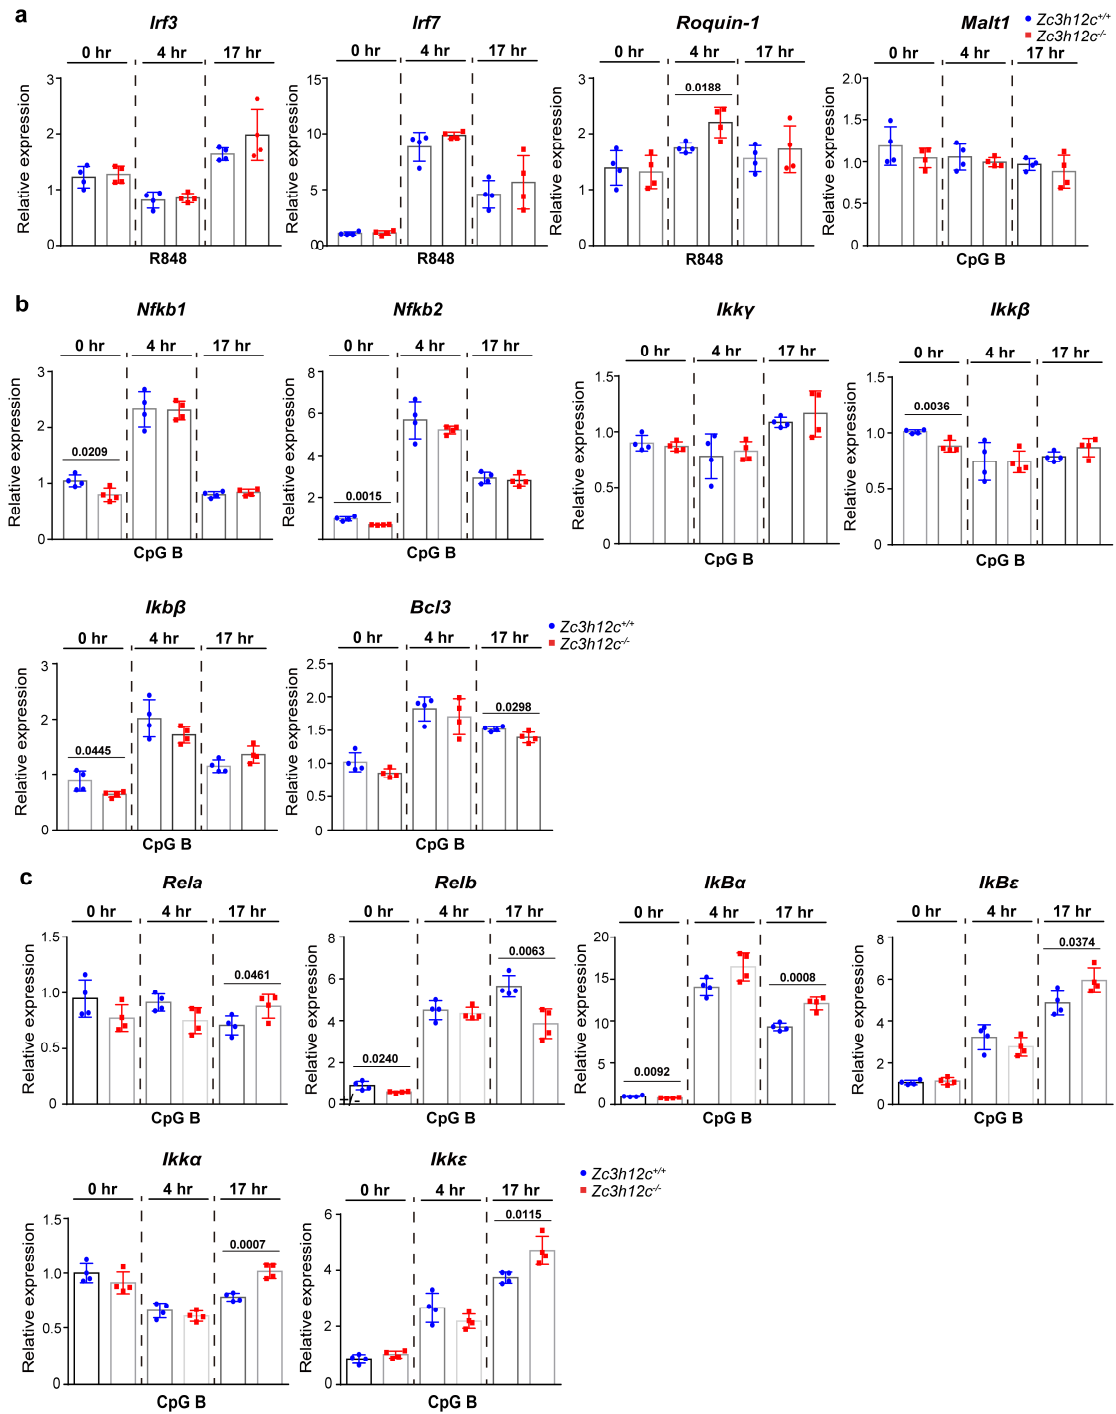

**Supplementary Fig. 7 Screening of transcriptional regulators in MCPiP3-deficient pDCs**  
**a-c** mRNA expressions of the indicated genes were measured by qPCR in sorted *Zc3h12c*<sup>+/+</sup>/*Zc3h12c*<sup>-/-</sup> Flt3-pDCs at indicated timepoints after R848 or CpG activation (n=4 mice). Source data are provided as a Source Data file (two-tailed Student's t-test). Data are representative of at least two independent experiments (mean±S.D.)

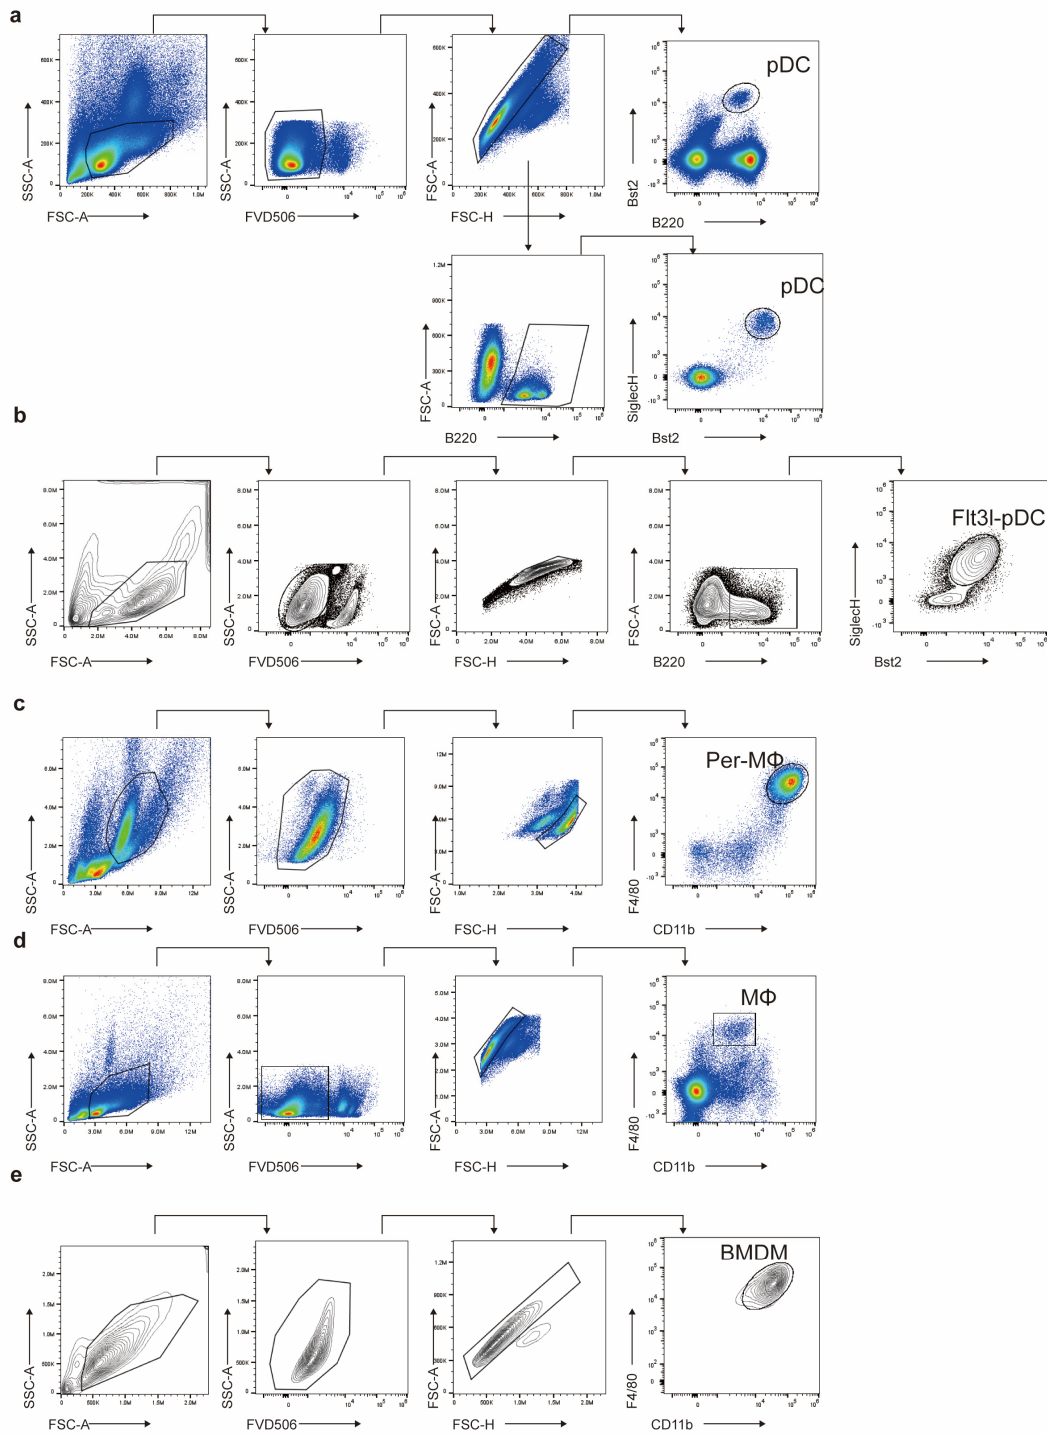

### Supplementary Fig. 8 Flow cytometry gating strategies

All immune cells are gated with FSC-A/SSC-A for a live gate. Then a viability dye (FVD506) is used to exclude dead cells. Next, FSC-A/FSC-H is used to exclude doublets. After these gating, cells are specifically gated accordingly below:

- a. Gating strategy (B220<sup>+</sup> Bst2<sup>+</sup>) to identify pDC presented on Fig. 3g and Supplementary Fig. 1e; Fig. 2e; Fig. 2g; Fig. 4e-f. Gating strategies (B220<sup>+</sup> Bst2<sup>+</sup> Siglech<sup>+</sup>) to identify pDCs presented on Fig 1f-g, Fig. 3c, e, h; Fig. 6e; Fig. 8e; Supplementary Fig. 1e, h, i.

- b.** Gating strategies (B220<sup>+</sup> Bst2<sup>+</sup> SiglecH<sup>+</sup>) to Flt3l-pDCs presented on Fig. 1f; Fig. 3b, d, l; Fig. 4i; Fig. 6a-d, f, h; Fig. 8f, h-j; Fig. 7.a-c; Supplementary Fig. 2i.
- c.** Gating strategies (CD11b<sup>+</sup> F4/80<sup>+</sup>) to identify or sort peritoneal cavity macrophages presented on Fig. 1f; Fig. 2f; Fig. 3b; Fig. 7h; Supplementary Fig. 1h; Supplementary Fig. 3b.
- d.** Gating strategies (CD11b<sup>+</sup> F4/80<sup>+</sup>) to identify splenic macrophages presented on Supplementary Fig. 2c.
- e.** Gating strategies (CD11b<sup>+</sup> F4/80<sup>+</sup>) to identify or sort bone marrow-derived macrophages (BMDMs) presented on Fig. 1h; Fig. 2a-i; Fig. 3.a, c-f, h; Fig.4a-c, l-n; Fig. 6a-h; Fig. 7g-i; Fig. 8a, e; Supplementary Fig. 2d.

Supplementary Table 1:

| Species | Gene/name             | Sequence (5' to 3')    |
|---------|-----------------------|------------------------|
| Murine  | <i>mqZc3h12a</i> -Fwd | CAGATATTACCGTGTGGTGCC  |
| Murine  | <i>mqZc3h12a</i> -Rvs | CTCTAGTTCCCGAAGGATGTG  |
| Murine  | <i>mqZc3h12b</i> -Fwd | GATCATGGAGAATGCAACGTG  |
| Murine  | <i>mqZc3h12b</i> -Rev | GGTTCCTTGAGCCTTGG      |
| Murine  | <i>mqZc3h12c</i> -Fwd | CGTGCCGAGGAATAAAATTGG  |
| Murine  | <i>mqZc3h12c</i> -Rvs | AGGGCGGGACTGTTCTTTTC   |
| Murine  | <i>mqZc3h12d</i> -Fwd | TGGCAGCAATGTGGCTAT     |
| Murine  | <i>mqZc3h12d</i> -Rvs | GTAGGTGTGCCTCTGTCTCTA  |
| Murine  | <i>mql12p40</i> -Fwd  | TGGTTTGCCATCGTTTTGCTG  |
| Murine  | <i>mql12p40</i> -Rvs  | ACAGGTGAGGTTCACTGTTTCT |
| Murine  | <i>mqa20</i> -Fwd     | ACAGGACTTTGCTACGACAC   |



|        |                       |                        |
|--------|-----------------------|------------------------|
| Murine | mqA20-Rvs             | CTGAGGATGTTGCTGAGGAC   |
| Murine | mqZfp36-Fwd           | CCGAATCCCTCGGAGGACTT   |
| Murine | mq Zfp36-Rvs          | GAGCCAAAGGTGCAAAACCA   |
| Murine | mqTia1-Fwd            | CACACAGCGTTCACAAGATCA  |
| Murine | mqTia1-Rvs            | GGTAGCCATGTCTTTTACCACA |
| Murine | mqHuR-Fwd             | GGATGACATTGGGAGAACGAAT |
| Murine | mqHuR-Rvs             | TGTCCTGCTACTTTATCCCGAA |
| Murine | mqIkB $\alpha$ -Fwd   | CGAGACTTTCGAGGAAATACCC |
| Murine | mqIkB $\alpha$ -Rvs   | GTCTGCGTCAAGACTGCTACA  |
| Murine | mqIkB $\beta$ -Fwd    | GCGGATGCCGATGAATGGT    |
| Murine | mqIkB $\beta$ -Rvs    | TGACGTAGCCAAAGACTAAGGG |
| Murine | mqIkB $\epsilon$ -Fwd | GCGGAGGCTGAATCACCAG    |

|        |                                  |                        |
|--------|----------------------------------|------------------------|
| Murine | mq <i>kBε</i> -Rvs               | GAAAGCCCGAACGTGTTCTCA  |
| Murine | mq <i>Bcl3</i> -Fwd              | CCGGAGGCCCTTTACTACCA   |
| Murine | mq <i>Bcl3</i> -Rvs              | GGAGTAGGGGTGAGTAGGCAG  |
| Murine | mq <i>Map3k3(Mekk3)</i> -<br>Fwd | ATAAGGACACAGGTCACCCAA  |
| Murine | mq <i>Map3k3(Mekk3)</i> -Rvs     | TGCTCCACATCTTCGTATCTCA |
| Murine | mq <i>Prkcz(Pkcζ)</i> -Fwd       | TTACGCCATGAAGGTGGTAAAG |
| Murine | mq <i>Prkcz(Pkcζ)</i> -Rvs       | CGCCATTGACATACTCGATGA  |
| Murine | mq <i>Tnfrsf1a(Tnfr1)</i> -Fwd   | ACAATCCCCTGTAAGGAGACTC |
| Murine | mq <i>Tnfrsf1a(Tnfr1)</i> -Rvs   | GCAAGGGACGCACTCACTT    |
| Murine | mq <i>Nfbiz</i> -Fwd             | GCTCCGACTCCTCCGATTTC   |
| Murine | mq <i>Nfbiz</i> -Rvs             | GAGTTCTTCACGCGAACACC   |
| Murine | mq <i>Malt1</i> -Fwd             | GGACAAAGTCGCCCTTTTGAT  |

|        |                                             |                         |
|--------|---------------------------------------------|-------------------------|
| Murine | mq <i>Malt1</i> -Rvs                        | TCCACAGCGTTACACATCTCA   |
| Murine | mq <i>Rc3h1</i> ( <i>Roquin-1</i> )-<br>Fwd | AGTGTTCTGAGTCGCCCAATG   |
| Murine | mq <i>Rc3h1</i> ( <i>Roquin-1</i> )-<br>Rvs | GCGTTCACCTAAAGATCGAGC   |
| Murine | mq <i>Ltβ</i> -Fwd                          | GATGACAGCAAACCGTCGTG    |
| Murine | mq <i>Ltβ</i> -Rvs                          | CCTGGAAGCATTGGATCTCTG   |
| Murine | mq <i>I6</i> -Fwd                           | CTGCAAGAGACTTCCATCCAG   |
| Murine | mq <i>I6</i> -Rvs                           | AGTGGTATAGACAGGTCTGTTGG |
| Murine | mq <i>Tnf</i> -Fwd                          | TAGCCCACGTCGTAGCAAA     |
| Murine | mq <i>Tnf</i> -Rvs                          | GATAGCAAATCGGCTGACG     |
| Murine | mq <i>Irf7</i> -Fwd                         | TCCAGTTGATCCGCATAAGGT   |
| Murine | Murine mq <i>Irf7</i> -Rvs                  | CTTCCCTATTTTCCGTGGCTG   |
| Murine | Murine mq <i>Irf3</i> -Fwd                  | GCGGGACTTCGTACATCTGG    |
| Murine | Murine mq <i>Irf3</i> -Rvs                  | TTCGGTAGGTTTTCTGGGAG    |

|        |                                                  |                          |
|--------|--------------------------------------------------|--------------------------|
| Murine | Murine <i>mqRela</i> (p65)-<br>Fwd               | AGGCTTCTGGGCCTTATGTG     |
| Murine | Murine <i>mqRela</i> (p65)-<br>Rvs               | TGCTTCTCTCGCCAGGAATAC    |
| Murine | Murine <i>mqRelb</i> -Fwd                        | CACCGGGTACACCCACATAG     |
| Murine | Murine <i>mqRelb</i> -Rvs                        | ATGCCCAGGTTGTTAAAGCTG    |
| Murine | Murine <i>mqRel(C-rel)</i> -<br>Fwd              | TGTCAGCGACTTGAGTGCAT     |
| Murine | Murine <i>mqRel(C-rel)</i> -<br>Rvs              | TGACATGGATGGCGTTTCCA     |
| Murine | Murine<br><i>mqNfkb1(p105/p50)</i> -<br>Fwd      | AGAGGGGATTTTCGATTCCGC    |
| Murine | Murine<br><i>mqNfkb1(p105/p50)</i> -<br>Rvs      | CCTGTGGGTAGGATTTCTTGTTCC |
| Murine | Murine <i>mq Nfkb2</i><br><i>(p100/p52)</i> -Fwd | GGCCGGAAGACCTATCCTACT    |
| Murine | Murine <i>mq Nfkb2</i><br><i>(p102/p52)</i> -Rvs | CTACAGACACAGCGCACACT     |
| Murine | Murine<br><i>mqChuk(IKKα)</i> -Fwd               | GTCAGGACCGTGTTCTCAAGG    |
| Murine | Murine<br><i>mqChuk(IKKα)</i> -Rvs               | GCTTCTTTGATGTTACTGAGGGC  |

|        |                                     |                                    |
|--------|-------------------------------------|------------------------------------|
| Murine | Murine<br>mqIkbkb(IKK $\beta$ )-Fwd | AAGTACACCGTGACCGTTGAC              |
| Murine | Murine<br>mqIkbkb(IKK $\beta$ )-Rvs | GCTGCCAGTTAGGGAGGAA                |
| Murine | Murine<br>mqNEMO(IKK $\gamma$ )-Fwd | AAGCACCCCTGGAAGAACC                |
| Murine | Murine<br>mqNEMO(IKK $\gamma$ )-Rvs | TCTCAGGAGTACCCTGCTCTG              |
| Murine | Murine<br>mqIkbke(IKKi)-Fwd         | CACGTTCGGGCTTTCTGAAGA              |
| Murine | Murine<br>mqIkbke(IKKi)-Rvs         | GACAGCTTATAGATGCTCTGCC             |
| Murine | mqActB-Fwd                          | GTGACGTTGACATCCGTAAAGA             |
| Murine | mqActB-Rvs                          | GCCGGACTCATCGTACTCC                |
| Human  | ZC3H12C Forward<br>Primer           | GGT GGC GGC TCC CAG GAA TA         |
| Human  | ZC3H12C Reverse<br>Primer           | ACG CCT CTT TTT CAT CCT TCC<br>CCA |
| Human  | 18S Forward Primer                  | GTA ACC CGT TGA ACC CCA TT         |
| Human  | 18S Reverse Primer                  | CCA TCC AAT CGG TAG TAG CG         |

|       |              |                              |
|-------|--------------|------------------------------|
| Virus | LCMV NP1-Fwd | GAGGCTTTCCATCCCAACTAT        |
| Virus | LCMV NP1-Rvs | AAGCTGAAGGCCAAGATCAT         |
| Virus | LCMV NP2-Fwd | CAGAAATGTTGATGCTGGACTGC      |
| Virus | LCMV NP2-Rvs | CAGACCTTGGCTTGCTTTACACAG     |
| Virus | LCMV GP-Fwd  | CATTACCTGGACTTTGTCAGACT<br>C |
| Virus | LCMV GP-Rvs  | GCAACTGCTGTGTTCCCGAAAC       |
